# Supplementary material for: Hydrographic fronts shape productivity, nitrogen fixation, and microbial community composition in the southern Indian Ocean and the Southern Ocean
Source: Copernicus journal article supplement (doi:10.5194/bg-18-3733-2021), 2021-06-22
Supplement: Supplementary file 2 [file bg-18-3733-2021-supplement.zip]

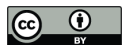

## *Supplement of*

# **Hydrographic fronts shape productivity, nitrogen fixation, and microbial community composition in the southern Indian Ocean and the Southern Ocean**

**Cora Hörstmann et al.**

*Correspondence to:* Cora Hörstmann (cora.hoerstmann@awi.de)

- bg-18-3733-2021-supplement-title-page.pdf
- bg-2021-52-supplement-version4
  - Supplementary
    - Figure S1.tif
    - Figure S10.tif
    - Figure S11.tif
    - Figure S2.tif
    - Figure S3.tif
    - Figure S4.tif
    - Figure S5.tif
    - Figure S6.tif
    - Figure S7.tif
    - Figure S8.tif
    - Figure S9.tif
    - S1\_code\_archive
    - Supplementary\_A\_Diagnostic\_Pigment\_Concentration..docx
    - Supplementary\_B\_Microbial analyses.docx
    - Supplementary\_C.pdf
    - Supplementary\_Figures.docx
    - Table S1.docx
    - Table S2.docx
    - Table S3.docx
    - Table S4.csv
    - Table S5.csv
    - Table S6.docx
    - Table S7.docx

The copyright of individual parts of the supplement might differ from the article licence.
